# Supplementary material
Source: HighWire-hosted journal article supplement (https://bmjopen.bmj.com/content/13/5/e065719)
Supplement: inline-supplementary-material-1 [file inline-supplementary-material-1.pdf]

| <b>Appendix 1: Consolidated criteria for reporting qualitative research (COREQ) checklist</b> |                                          |                                                                                                                                                          |      |
|-----------------------------------------------------------------------------------------------|------------------------------------------|----------------------------------------------------------------------------------------------------------------------------------------------------------|------|
| No.                                                                                           | Item                                     | Guide questions/description                                                                                                                              | Page |
| <i>Domain 1: Research team and reflexivity</i>                                                |                                          |                                                                                                                                                          |      |
| Personal characteristics                                                                      |                                          |                                                                                                                                                          |      |
| 1                                                                                             | Interviewer/facilitator                  | Which author/s conducted the interview or focus group?                                                                                                   | 9    |
| 2                                                                                             | Credentials                              | What were the researcher's credentials? E.g. PhD, MD                                                                                                     | 9    |
| 3                                                                                             | Occupation                               | What was their occupation at the time of the study?                                                                                                      | 9    |
| 4                                                                                             | Gender                                   | Was the researcher male or female?                                                                                                                       | N/A  |
| 5                                                                                             | Experience and training                  | What experience or training did the researcher have?                                                                                                     | 9    |
| Relationship with participants                                                                |                                          |                                                                                                                                                          |      |
| 6                                                                                             | Relationship established                 | Was a relationship established prior to study commencement?                                                                                              | 10   |
| 7                                                                                             | Participant knowledge of the interviewer | What did the participants know about the researcher? e.g. personal goals, reasons for doing the research                                                 | 10   |
| 8                                                                                             | Interviewer characteristics              | What characteristics were reported about the interviewer/facilitator? e.g. Bias, assumptions, reasons and interests in the research topic                | 10   |
| <i>Domain 2: study design</i>                                                                 |                                          |                                                                                                                                                          |      |
| Theoretical framework                                                                         |                                          |                                                                                                                                                          |      |
| 9                                                                                             | Methodological orientation and Theory    | What methodological orientation was stated to underpin the study? e.g. grounded theory, discourse analysis, ethnography, phenomenology, content analysis | 9    |
| Participant selection                                                                         |                                          |                                                                                                                                                          |      |
| 10                                                                                            | Sampling                                 | How were participants selected? e.g. purposive, convenience, consecutive, snowball                                                                       | 8    |
| 11                                                                                            | Method of approach                       | How were participants approached? e.g. face-to-face, telephone, mail, email                                                                              | 8    |
| 12                                                                                            | Sample size                              | How many participants were in the study?                                                                                                                 | 8    |
| 13                                                                                            | Non-participation                        | How many people refused to participate or dropped out? Reasons?                                                                                          | 8    |
| Setting                                                                                       |                                          |                                                                                                                                                          |      |
| 14                                                                                            | Setting of data collection               | Where was the data collected? e.g. home, clinic, workplace                                                                                               | 8    |
| 15                                                                                            | Presence of non-participants             | Was anyone else present besides the participants and researchers?                                                                                        | 8    |
| 16                                                                                            | Description of sample                    | What are the important characteristics of the sample? e.g. demographic data, date                                                                        | 10   |
| Data collection                                                                               |                                          |                                                                                                                                                          |      |
| 17                                                                                            | Interview guide                          | Were questions, prompts, guides provided by the authors? Was it pilot tested?                                                                            | 8    |
| 18                                                                                            | Repeat interviews                        | Were repeat interviews carried out? If yes, how many?                                                                                                    | 8    |
| 19                                                                                            | Audio/visual recording                   | Did the research use audio or visual recording to collect the data?                                                                                      | 8    |
| 20                                                                                            | Field notes                              | Were field notes made during and/or after the interview or focus group?                                                                                  | N/A  |

|                                        |                                |                                                                                                                                   |          |
|----------------------------------------|--------------------------------|-----------------------------------------------------------------------------------------------------------------------------------|----------|
| <b>21</b>                              | Duration                       | What was the duration of the interviews or focus group?                                                                           | 10       |
| <b>22</b>                              | Data saturation                | Was data saturation discussed?                                                                                                    | 24       |
| <b>23</b>                              | Transcripts returned           | Were transcripts returned to participants for comment and/or correction?                                                          | 9        |
| <i>Domain 3: analysis and findings</i> |                                |                                                                                                                                   |          |
| Data analysis                          |                                |                                                                                                                                   |          |
| <b>24</b>                              | Number of data coders          | How many data coders coded the data?                                                                                              | 9        |
| <b>25</b>                              | Description of the coding tree | Did authors provide a description of the coding tree?                                                                             | Appendix |
| <b>26</b>                              | Derivation of themes           | Were themes identified in advance or derived from the data?                                                                       | 9        |
| <b>27</b>                              | Software                       | What software, if applicable, was used to manage the data?                                                                        | 9        |
| <b>28</b>                              | Participant checking           | Did participants provide feedback on the findings?                                                                                | N/A      |
| Reporting                              |                                |                                                                                                                                   |          |
| <b>29</b>                              | Quotations presented           | Were participant quotations presented to illustrate the themes / findings? Was each quotation identified? e.g. participant number | 10       |
| <b>30</b>                              | Data and findings consistent   | Was there consistency between the data presented and the findings?                                                                | 21       |
| <b>31</b>                              | Clarity of major themes        | Were major themes clearly presented in the findings?                                                                              | 10       |
| <b>32</b>                              | Clarity of minor themes        | Is there a description of diverse cases or discussion of minor themes?                                                            | 10       |

Adapted from: Tong A, Sainsbury P, Craig J. Consolidated criteria for reporting qualitative research (COREQ): a 32-item checklist for interviews and focus groups. *Int J Qual Health Care*. 2007;19(6):349-57. doi: 10.1093/intqhc/mzm042.
